# Supplementary material for: An efficient catalyst of CuPt/TiO2 for photocatalytic direct dehydrogenation of methanol to methyl formate at ambient temperature
Source: Royal Society of Chemistry journal article supplement (doi:10.1039/d1cy02020j), 2021-12-13
Supplement: d1cy02020j1.pdf [file d1cy02020j1.pdf]

## Supplementary Information

# **An Efficient Catalyst of CuPt/TiO<sub>2</sub> for Photocatalytic Direct Dehydrogenation of Methanol to Methyl Formate at Ambient Temperature**

Haifeng Zhang,<sup>a</sup> Xuzhuang Yang,<sup>\* a, b</sup> Guanjun Gao,<sup>a</sup> Jingkai Yan,<sup>a</sup> Min Zhao,<sup>a</sup> and Haiquan Su<sup>a, b</sup>

<sup>a</sup> *School of Chemistry and Chemical Engineering, Inner Mongolia University, Hohhot, Inner Mongolia, 010021, P. R. China*

<sup>b</sup> *Inner Mongolia Key Lab of Rare Earth Materials Chemistry and Physics, , Hohhot, Inner Mongolia, 010021, P. R. China.*

Table S1. Catalytic performance of various catalysts in the oxidative dehydrogenation of methanol under thermal condition

| Entry              | Support                                          | Loading                                 | Temp. (°C) | Conv. MeOH (%) | Sel. MF (%) | by-products                                                                      |
|--------------------|--------------------------------------------------|-----------------------------------------|------------|----------------|-------------|----------------------------------------------------------------------------------|
| 1 <sup>[1]</sup>   | SiO <sub>2</sub>                                 | PdCu                                    | 160        | 65             | 92          | CO <sub>2</sub>                                                                  |
| 2 <sup>[2]</sup>   | VTiO                                             | rGO                                     | 135        | 99.6           | 99.2        | CO <sub>2</sub>                                                                  |
| 3 <sup>[3]</sup>   | CeO <sub>2</sub>                                 | ReOx                                    | 240        | 40             | 90          | CO <sub>2</sub> ,H <sub>2</sub> CO,Methylal                                      |
| 4 <sup>[4]</sup>   | Sn-Mo-O                                          | --                                      | 225        | 50             | 35-50       | CO <sub>2</sub> ,H <sub>2</sub> CO,H <sub>3</sub> COCH <sub>3</sub>              |
| 5 <sup>[5]</sup>   | Sn-Mo(7:3)                                       | --                                      | 160        | 72             | 90          | CO,CO <sub>2</sub> ,H <sub>2</sub> CO,HCOOH                                      |
| 6 <sup>[6]</sup>   | Vanadia-titania<br>-sulfate                      | --                                      | 145        | 98.7           | 98.6        | H <sub>2</sub> CO,Methylal,H <sub>3</sub> COCH <sub>3</sub>                      |
| 7 <sup>[7]</sup>   | TiO <sub>2</sub>                                 | AuPd                                    | 230        | 25             | 70          | CO <sub>2</sub>                                                                  |
| 8 <sup>[8]</sup>   | SiO <sub>2</sub>                                 | Pd                                      | 80         | 88             | 72          | CO <sub>2</sub>                                                                  |
| 9 <sup>[9]</sup>   | CNT                                              | RuO <sub>2</sub>                        | 120        | 20             | 33          | CO <sub>2</sub> ,H <sub>2</sub> CO,Methylal                                      |
| 10 <sup>[10]</sup> | TiO <sub>2</sub>                                 | Pd                                      | 80         | 78             | 52          | CO <sub>2</sub>                                                                  |
| 11 <sup>[11]</sup> | Fe <sub>2</sub> O <sub>3</sub>                   | Pd                                      | 80         | 76             | 81          | CO,CO <sub>2</sub>                                                               |
| 12 <sup>[12]</sup> | Al-fiber                                         | Au                                      | 140        | 50             | 90          | CO <sub>2</sub> ,H <sub>2</sub> CO                                               |
| 13 <sup>[13]</sup> | Graphene                                         | AuPd                                    | 70         | 90             | 100         | --                                                                               |
| 14 <sup>[14]</sup> | TiO <sub>2</sub>                                 | PdPt                                    | 50         | 78             | 67          | CO <sub>2</sub>                                                                  |
| 15 <sup>[15]</sup> | Al-fiber                                         | Porous Au                               | 160        | 35             | 85          | CO <sub>2</sub> ,H <sub>2</sub> CO                                               |
| 16 <sup>[16]</sup> | Porous Au                                        | --                                      | 80         | 60             | 97          | CO <sub>2</sub>                                                                  |
| 17 <sup>[17]</sup> | TiO <sub>2</sub>                                 | V <sub>2</sub> O <sub>5</sub>           | 100-150    | 85             | 82.5        | CO,CO <sub>2</sub> ,H <sub>2</sub> CO,HCOOH,<br>Methylal                         |
| 18 <sup>[18]</sup> | SiO <sub>2</sub>                                 | AuPd                                    | 130        | 57             | 72.7        | CO <sub>2</sub>                                                                  |
| 19 <sup>[19]</sup> | ZrO <sub>2</sub>                                 | RuOx                                    | 100        | 20             | 90.3        | CO <sub>2</sub> ,H <sub>2</sub> CO                                               |
| 20 <sup>[20]</sup> | ZrO <sub>2</sub>                                 | RuOx                                    | 100        | 15             | 96          | CO <sub>2</sub> ,H <sub>2</sub> CO                                               |
| 21 <sup>[21]</sup> | ZrO <sub>2</sub>                                 | RuOx                                    | 100        | 20             | 96          | CO <sub>2</sub> ,H <sub>2</sub> CO                                               |
| 22 <sup>[22]</sup> | TS-1                                             | VOx                                     | 170        | 56.7           | 16.2        | COx,H <sub>2</sub> CO,Methylal,<br>H <sub>3</sub> COCH <sub>3</sub>              |
| 23 <sup>[23]</sup> | TiO <sub>2</sub>                                 | V <sub>2</sub> O <sub>5</sub>           | 170        | 95             | 66          | H <sub>2</sub> CO,Methylal,H <sub>3</sub> COCH <sub>3</sub>                      |
| 24 <sup>[24]</sup> | TiO <sub>2</sub>                                 | VOx                                     | 120        | 44             | 16.87       | COx,H <sub>2</sub> CO,Methylal,<br>H <sub>3</sub> COCH <sub>3</sub>              |
| 25 <sup>[25]</sup> | TiO <sub>2</sub>                                 | V <sub>2</sub> O <sub>5</sub>           | 120        | 33             | 14.47       | COx,H <sub>2</sub> CO,Methylal,<br>H <sub>3</sub> COCH <sub>3</sub>              |
| 26 <sup>[26]</sup> | ZrO <sub>2</sub> -Al <sub>2</sub> O <sub>3</sub> | V <sub>2</sub> O <sub>5</sub>           | 215        | 66             | 30          | H <sub>2</sub> CO,Methylal,COx                                                   |
| 27 <sup>[27]</sup> | TiO <sub>2</sub> -SO <sub>4</sub> <sup>2-</sup>  | V <sub>2</sub> O <sub>5</sub>           | 170        | 92             | 79          | COx,H <sub>2</sub> CO,Methylal,<br>H <sub>3</sub> COCH <sub>3</sub>              |
| 28 <sup>[28]</sup> | TiO <sub>2</sub>                                 | VOx                                     | 160        | 47             | 57          | H <sub>2</sub> CO,Methylal,<br>H <sub>3</sub> COCH <sub>3</sub>                  |
| 29 <sup>[29]</sup> | TiO <sub>2</sub>                                 | Hollow<br>V <sub>2</sub> O <sub>5</sub> | 120-170    | 95             | 92          | Methylal                                                                         |
| 30 <sup>[30]</sup> | SBA-15                                           | AgPt                                    | 200        | 30             | 73          | CO <sub>2</sub> ,H <sub>2</sub> CO,Methylal,<br>H <sub>3</sub> COCH <sub>3</sub> |

Table S2. Catalytic performance of various catalysts in the direct dehydrogenation of methanol under thermal condition

| Entry              | Support                                           | Loading  | Temp. (°C) | Conv. MeOH (%) | Sel. MF (%) |
|--------------------|---------------------------------------------------|----------|------------|----------------|-------------|
| 31 <sup>[31]</sup> | hectorite                                         | Cu       | 220        | 12             | 19          |
| 32 <sup>[32]</sup> | TSM                                               | Cu       | 400        | 82.1           | 31.8        |
| 33 <sup>[33]</sup> | SiO <sub>2</sub>                                  | Cu       | 220        | 31.1           | 81.4        |
| 34 <sup>[34]</sup> | Mo <sub>2</sub> C                                 | --       | 200        | 20             | 41          |
|                    | W <sub>2</sub> C                                  | --       | 220        | 20             | 17          |
|                    | WC                                                | --       | 200        | 20             | 81          |
| 35 <sup>[35]</sup> | TSM                                               | Cu( II ) | 240        | 44.8           | 100         |
|                    | TSM                                               | Cu( I )  | 240        | 4.3            | 100         |
|                    | SiO <sub>2</sub>                                  | Cu(0)    | 300        | 7.1            | 45          |
| 36 <sup>[36]</sup> | SiO <sub>2</sub>                                  | Cu       | 180        | 24             | 90          |
|                    | SiO <sub>2</sub>                                  | Cu       | 250        | 62             | 25          |
| 37 <sup>[37]</sup> | TiO <sub>2</sub>                                  | Cu       | 250        | 21             | 91          |
|                    | ZrO <sub>2</sub>                                  | Cu       | 250        | 30             | 63          |
| 38 <sup>[38]</sup> | Cr <sub>2</sub> O <sub>3</sub> :SiO <sub>2</sub>  | Cu       | 200-270    | 41             | 35          |
| 39 <sup>[39]</sup> | MO <sub>x</sub> (M=Si,Zr,Mg,Zn,Cr and graphite)   | Cu       | 220        | 41             | 58          |
| 40 <sup>[40]</sup> | ZnO                                               | Pd       | 200        | 20.5           | 80          |
| 41 <sup>[41]</sup> | LaM <sub>1-x</sub> Cu <sub>x</sub> O <sub>3</sub> | --       | 200-260    | 40             | 65          |
| 42 <sup>[42]</sup> | ZnO                                               | Cu       | 200        | 20             | 35          |
| 43 <sup>[43]</sup> | SiO <sub>2</sub>                                  | Cu-PAN   | 250        | 45.4           | 97.4        |
|                    | Clay (Lapo)                                       | Cu       | 200        | 35.8           | 82.2        |
| 44 <sup>[44]</sup> | Clay (Sapo)                                       | Cu       | 200        | 9.9            | 12.1        |
|                    | TSM                                               | Cu       | 200        | 19.7           | 89.3        |
| 45 <sup>[45]</sup> | CuAl <sub>2</sub> O <sub>4</sub>                  | --       | 310        | 63.6           | 57.0        |
| 46 <sup>[46]</sup> | Cr <sub>2</sub> O <sub>3</sub>                    | Cu       | 207        | 48             | 99          |
| 47 <sup>[47]</sup> | SiO <sub>2</sub>                                  | Cu       | 230        | 50             | 75-80       |
|                    | copper chromite                                   |          |            |                |             |
|                    | copper hydroxysilicate                            | --       | 150-270    | 10             | 100         |
| 48 <sup>[48]</sup> | copper-zinc hydroxysilicate                       |          |            |                |             |
|                    | Zeolite                                           | Cu       | 280        | 27.9           | 72.4        |
| 49 <sup>[49]</sup> | mSiO <sub>2</sub>                                 | Cu       | 230        | 40             | 80          |
| 51 <sup>[51]</sup> | CuMgO                                             | Pd       | 250        | 16.7           | 88.1        |

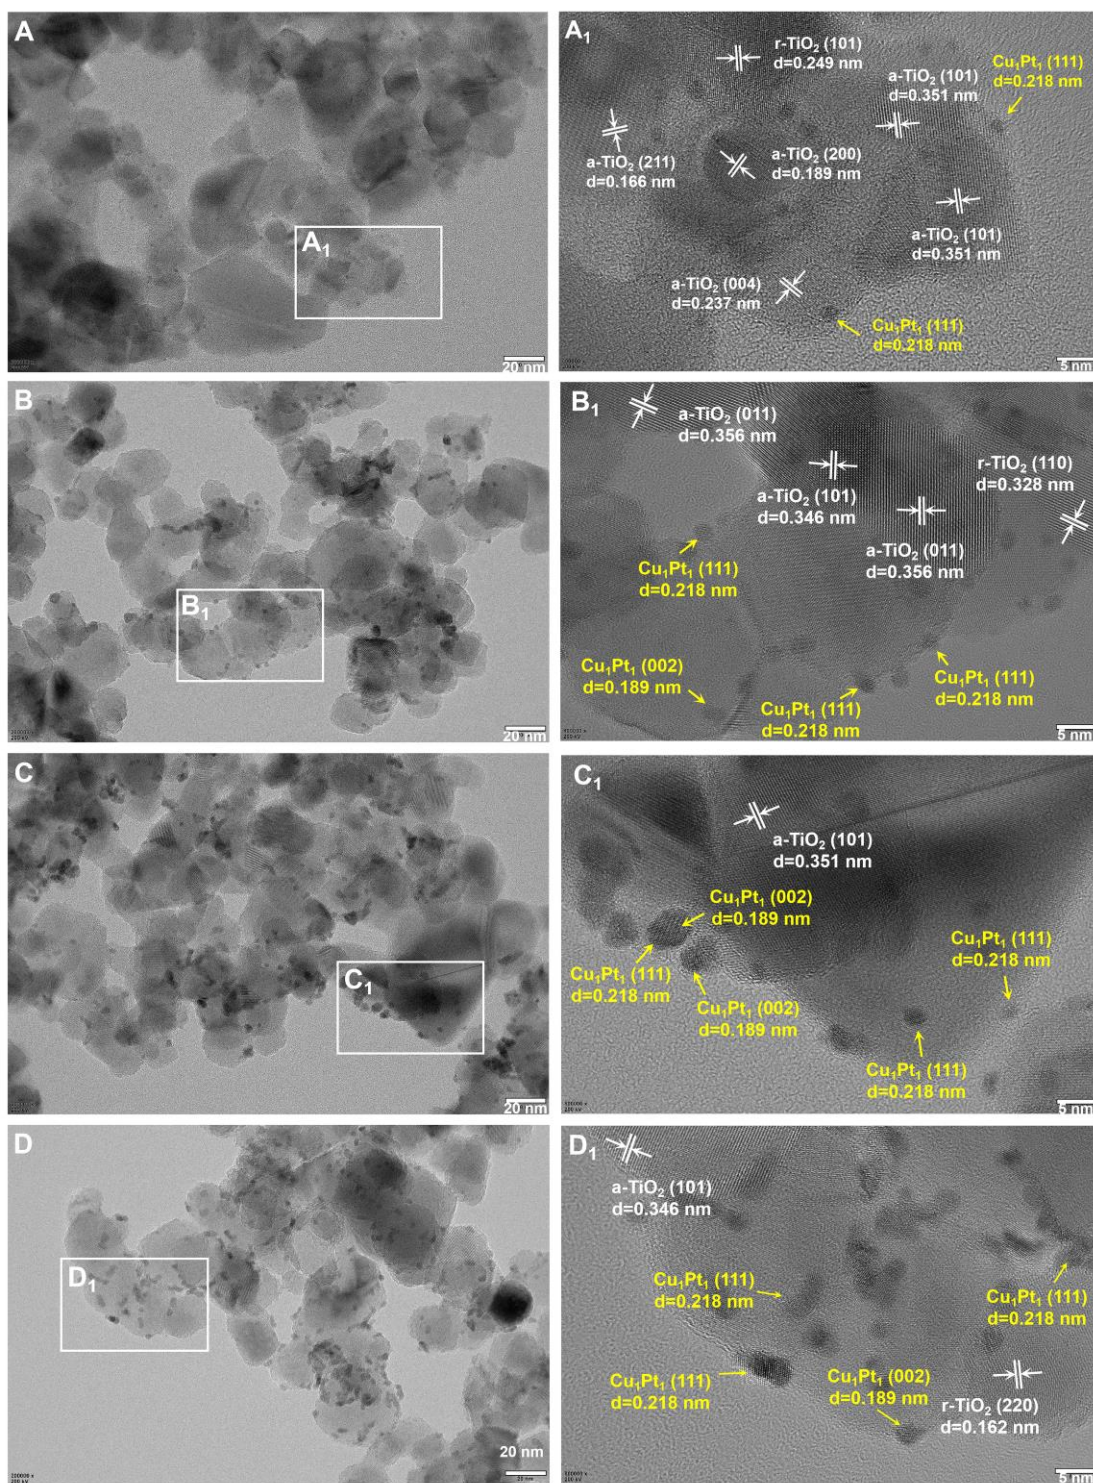

Figure S1. TEM and HR-TEM images of catalysts with different metal content. A. 1% CuPt (1:1)/TiO<sub>2</sub>; B. 2% CuPt (1:1)/TiO<sub>2</sub>; C. 4% CuPt (1:1)/TiO<sub>2</sub> and D. 6% CuPt (1:1)/TiO<sub>2</sub>.

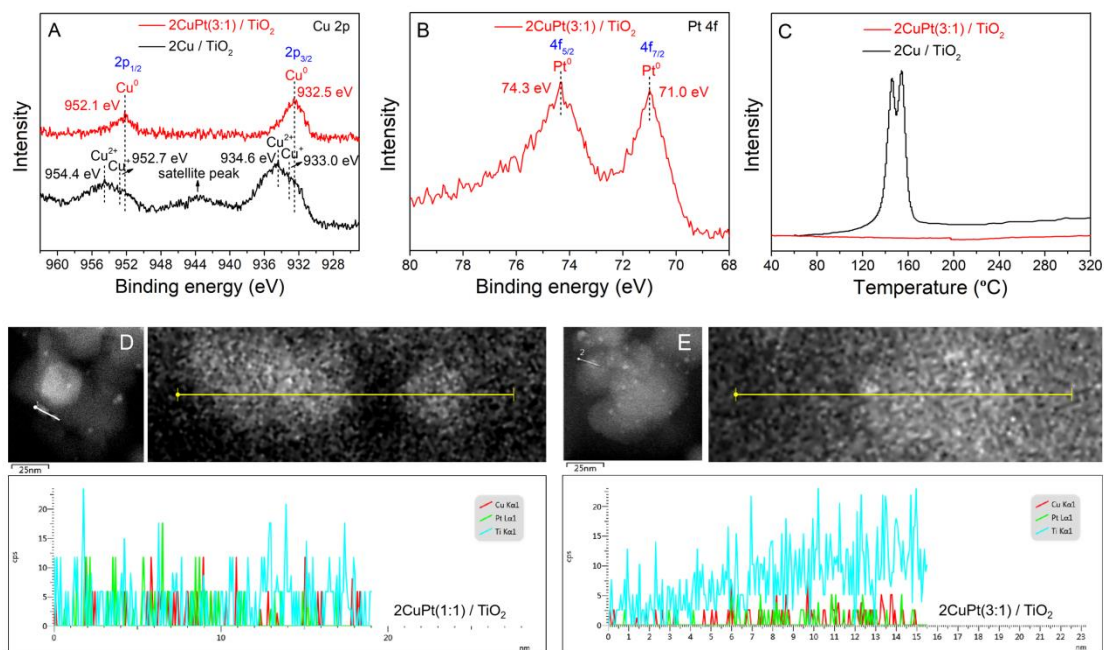

Figure S2. XPS (A, B), TPR (C) and line scan based on the HADDF-stem (D, E) of catalysts with different metal content.

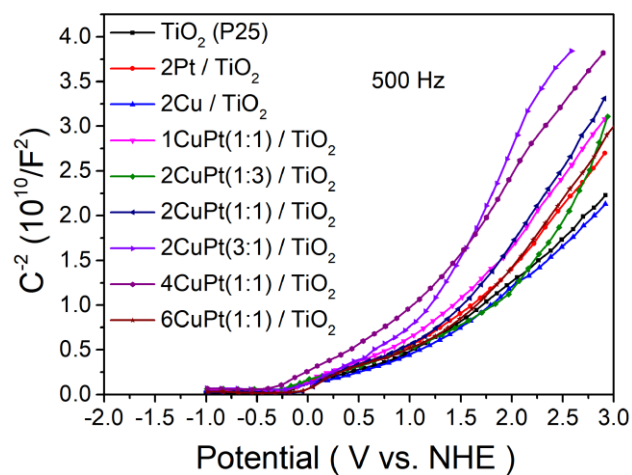

Figure S3. Mott-Schottky diagram of the catalyst at 500 Hz in 0.2 M Na<sub>2</sub>SO<sub>4</sub> solution.

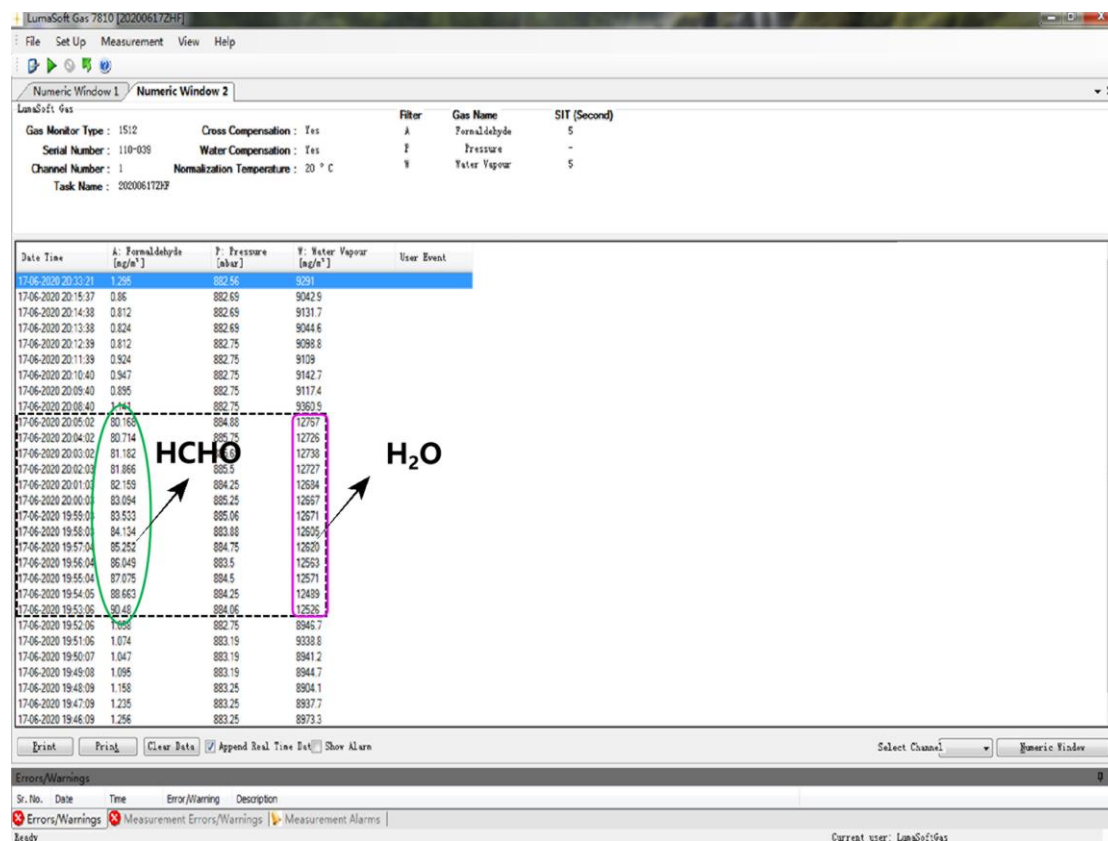

Figure S4. The HCHO and H<sub>2</sub>O were detected in the reaction by Photoacoustic Gas Monitor- Innova 1512 installed by LumaSense Technologies.

## References

- [1] J. Shan, G. Giannakakis, J. Liu, S. Cao, M. Ouyang, M. Li, S. Lee, M. F. Stephanopoulos, *Top. Catal.* 2020, 63, 618-627.
- [2] Y. Zhang, G. Liu, L. Shi, P. Wu, G. Zeng, C. Zhang, N. Yang, S. Li, Y. Sun, *iScience*. 2020, 23, 101157.
- [3] J. Liu, E. Zhan, W. Cai, J. Li, W. Shen, *Catal. Lett.* 2008, 120, 274-280.
- [4] N.G. Valente, L.E. Cadus, O.F. Gorriz, L.A. Artria, J.B. Rivarola, *Appl. Catal. A* 1997, 153, 119-132.
- [5] MAMORU AI, *J. Catal.* 1982, 77, 279-288.
- [6] Z. Liu, R. Zhang, S. Wang, N. Li, R. Sima, G. Liu, P. Wu, G. Zeng, S. Li, Y. Sun, *J. Phys. Chem. C* 2016, 120, 6591-6600.
- [7] G. T. Whiting, S. A. Kondrat, C. Hammond, N. Dimitratos, Q. He, D. J. Morgan, N. F. Dummer, J. K. Bartley, C. J. Kiely, S. H. Taylor, G. J. Hutchings, *ACS Catal.* 2015, 5, 637-644.
- [8] R. Wojcieszak, A. Karelovic, E. M. Gagneaux, P. Ruiz, *Catal. Sci. Technol.* 2014, 4, 3298-3305.
- [9] H. Yu, K. Zeng, X. Fu, Y. Zhang, F. Peng, H. Wang, J. Yang, *J. Phys. Chem. C* 2008, 112, 11875-11880.

- [10] R. Wojcieszak, E. M. Gaigneaux, P. Ruiz, *ChemCatChem*, 2013, 5, 339-348.
- [11] R. Wojcieszak, M. N. Ghazzal, E. M. Gaigneaux, P. Ruiz, *Catal. Sci. Technol.* 2014, 4, 738-745.
- [12] Q. Zhang, Y. Li, L. Zhang, L. Chen, Y. Liu, Y. Lu, *J. Catal.* 2014, 317, 54-61.
- [13] R. Wang, Z. Wu, C. Chen, Z. Qin, H. Zhu, G. Wang, H. Wang, C. Wu, W. Dong, W. Fan, J. Wang, *Chem. Commun.* 2013, 49, 8250-8252.
- [14] V. G. Baldovino-Medrano, G. Pollefeyt, V. Bliznuk, I. V. Driessche, E. M. Gaigneaux, P. Ruiz, R. Wojcieszak, *ChemCatChem*, 2016, 8, 1157-1166.
- [15] Q. Zhang, Y. Li, L. Zhang, L. Chen, Y. Liu, Y. Lu, *Green Chem.* 2014, 16, 2992-2996.
- [16] A. Wittstock, V. Zielasek, J. Biener, C. M. Friend, M. Bäumer, *Science*. 2010, 327, 319-322.
- [17] V. V. Kaichev, G. Ya. Popova, Yu. A. Chesalov, A. A. Saraev, D. Y. Zemlyanov, S. A. Beloshapkin, A. Knop-Gericke, R. Schlögl, T. V. Andrushkevich, V. I. Bukhtiyarov, *J. Catal.* 2014, 311, 59-70.
- [18] J. Wu, R. Shi, Z. F. Qin, H. Liu, Z. K. Li, H. Q. Zhu, Y. X. Zhao, J. G. Wang, *J. Fuel Chem. Technol.* 2019, 47, 780-790.
- [19] W. Li, H. Zhang, X. He, H. Liu, *J. Energy Chem.* 2013, 22, 512-516.
- [20] W. Li, H. Liu, E. Iglesia, *J. Phys. Chem. B* 2006, 110, 23337-23342.
- [21] H. Huang, W. Li, H. Liu, *Catal.Today*. 2012, 183, 58-64.
- [22] S. Chen, S. Wang, X. Ma, J. Gong, *Chem. Commun.* 2011, 47, 9345-9347.
- [23] Z. Fan, H. Guo, K. Fang, Y. Sun, *RSC Adv.* 2015, 5, 24795-24802.
- [24] H. Guo, D. Li, D. Jiang, W. Li, Y. Sun, *Catal. Commun.* 2010, 11, 396-400.
- [25] H. Guo, D. Li, D. Jiang, H. Xiao, W. Li, Y. Sun, *Catal.Today*. 2010, 158, 439-445.
- [26] Y. Zhao, Z. Qin, G. Wang, M. Dong, L. Huang, Z. Wu, W. Fan, J. Wang, *Fuel*. 2013, 104, 22-27.
- [27] H. Zhao, S. Bennici, J. Shen, A. Auroux, *J. Catal.* 2010, 272, 176-189.
- [28] J. Liu, Q. Sun, Y. Fu, J. Shen, *J. Colloid Interface Sci.* 2009, 335, 216-221.
- [29] C. Zhang, P. Wu, G. Liu, Z. Zhu, G. Zeng, *ACS Appl. Nano Mater.* 2019, 2, 5224-5232.
- [30] J. Wisniewska, I. Dziedzic, M. Ziolk, *RSC Adv.* 2020, 10, 14570-14580.
- [31] Y. Morikawa, K. Takagi, Y. Moro-Oka, T. Ikawa, *Chem. Lett.* 1982, 11, 1805-1808.
- [32] Y. Morikawa, K. Takagi, Y. Moro-Oka, T. Ikawa, *Chem. Lett.* 1982, 11, 1667-1670.
- [33] S. P. Tonner, D. L. Trimm, M. S. Wainwright, N. W. Cant, *Ind. Eng. Chem. Prod. Res. Dev.* 1984, 23, 384-388.
- [34] E. Miyazaki, L. Kojima, M. Orita, *J. Chem. Soc.* 1985, 3, 108-109.
- [35] K. Takagi, Y. Morikawa, T. Ikawa, *Chem. Lett.* 1985, 24, 111-130.
- [36] T. Sodesawa, M. Nagacho, A. Onodera, F. Nozaki, *J. Catal.* 1986, 102, 460-463.
- [37] T. Sodesawa, *React. Kinet. Catal. Lett.* 1986, 32, 63-69.
- [38] V. M. Rao, V. Shankar, *J. Chem. Tech. Biotechnol.* 1988, 42, 183-196.
- [39] A. G-Ruiz, I. R-Ramos, J. L. G. Fierro, *Appl. Catal.* 1991, 72, 119-137.
- [40] N. Iwasa, O. Yamamoto, T. Akazawa, S. Ohyama, N. Takezawa, *J. Chem. Soc Chem. Commun.* 1991, 18, 1322-1323.
- [41] I. R-Ramos, A. G-Ruiz, M. L. Rojas, J. L. G. Fierro, *Cheminform.* 1991, 22, 217-228.
- [42] M. J. Chung, D. J. Moon, K. Y. Park, S. K. Ihm, *J. Catal.* 1992, 136, 609-612.

- [43] Z. T. Liu, D. S. Lu, Z. Y. Guo, *Appl. Catal. A* 1994, 118, 163-171.
- [44] T. Matsuda, K. Yogo, C. Pantawong, E. Kikuchi, *Appl. Catal. A* 1995, 126, 177-186.
- [45] S. Sato, M. Iijima, T. Nakayama, T. Sodesawa, F. Nozaki, *J. Catal.* 1997, 169, 447-454.
- [46] Y. Wang, G. Ruan, S. Han, *React. Kinet. Catal. Lett.* 1999, 67, 305-310.
- [47] E.D. Guerreiro, O.F. Gorrioz, G. Larsen, L.A. Arrúa, *Appl. Catal. A* 2000, 204, 33-48.
- [48] T.P. Minyukova, I.I. Simentsova, A.V. Khasin, N.V. Shtertser, N.A. Baronskaya, A.A. Khassin, T.M. Yurieva, *Appl. Catal. A* 2002, 237, 171-180.
- [49] D. Gao, H. Yin, Y. Feng, A. Wang, *Can. J. Chem. Eng.* 2015, 93, 1107-1118.
- [50] H. Yang, Y. Chen, X. Cui, G. Wang, Y. Cen, T. Deng, W. Yan, J. Gao, S. Zhu, U. Olsbye, J. Wang, W. Fan, *Angew. Chem. Int. Ed.* 2018, 57, 1836-1840.
- [51] D. J. Yuan, A. M. Hengne, Y. Saih, K. W. Huang, *ACS Omega* 2019, 4, 1854-1860.
